# Supplementary material
Source: PubMed Central journal article supplement (PMC4955221)
Supplement: ANGE-127-15465-s001.pdf [file ANGE-127-15465-s001.pdf]

## Supporting Information

### **Isolation of Elusive HAsAsH in a Crystalline Diuranium(IV) Complex**

*Benedict M. Gardner, Gábor Balázs, Manfred Scheer,\* Ashley J. Wooles, Floriana Tuna, Eric J. L. McInnes, Jonathan McMaster, William Lewis, Alexander J. Blake, and Stephen T. Liddle\**

ange\_201508600\_sm\_miscellaneous\_information.pdf

## Experimental

### *General*

All manipulations were carried out using Schlenk techniques, or an MBraun UniLab glovebox, under an atmosphere of dry nitrogen. Solvents were dried by passage through activated alumina towers and degassed before use. All solvents were stored over potassium mirrors except for THF which was stored over activated 4 Å sieves. Deuterated solvent was distilled from potassium, degassed by three freeze-pump-thaw cycles and stored under nitrogen.  $[\text{U}(\text{Tren}^{\text{TIPS}})(\text{THF})][\text{BPh}_4]$  (**1**),  $[\text{U}(\text{Tren}^{\text{TIPS}})(\text{AsH}_2)]$  (**2**), and  $\text{KAsH}_2$  were prepared according to literature methods.<sup>1-3</sup>  $^1\text{H}$  and  $^{29}\text{Si}$  NMR spectra were recorded on a Bruker 400 spectrometer operating at 400.2 and 79.5 MHz respectively; chemical shifts are quoted in ppm and are relative to TMS. FTIR spectra were recorded on a Bruker Alpha-Platinum ATR spectrometer. Variable-temperature magnetic moment data were recorded in an applied dc field of 0.1 T on a Quantum Design MPMS XL5 superconducting quantum interference device (SQUID) magnetometer. Samples were carefully checked for purity and data reproducibility. Care was taken to ensure complete thermalisation of the sample before each data point was measured and samples were immobilised in an eicosane matrix to prevent sample reorientation during measurements. Diamagnetic corrections were applied using tabulated Pascal constants and measurements were corrected for the effect of the blank sample holders (flame sealed Wilmad NMR tube and straw) and eicosane matrix. Solution magnetic moments were recorded at room temperature using the Evans method. Elemental microanalyses were carried out by Tong Liu at the University of Nottingham.

In the X-ray crystal structure of **3**, the arsenic-bound hydrogen atoms were initially located in the Fourier transform difference maps and refined with geometric restraints based on literature data and metrical data computed from the DFT geometry optimisations.

**Preparation of  $\{U(\text{Tren}^{\text{TIPS}})\}_2(\mu\text{-}\eta^2\text{:}\eta^2\text{-As}_2\text{H}_2)$  (**3**)**

*Method A:* THF (20 ml) was added to a cold ( $-78\text{ }^\circ\text{C}$ ) mixture of **1** (0.62 g, 0.50 mmol) and finely ground  $\text{KAsH}_2$  (81 mg, 0.70 mmol). The dark brown slurry was allowed to warm to room temperature whilst stirring (30 mins) to afford a dark brown suspension, which was then stirred at room temperature overnight.

*Method B:* Compound **2** (1.16 g, 1.25 mmol) was treated with  $\text{KAsH}_2$  (81 mg, 0.70 mmol) in THF (10 ml) at  $-78\text{ }^\circ\text{C}$ . The dark brown slurry was allowed to warm to room temperature whilst stirring (30 mins) to afford a dark brown suspension, which was then stirred at room temperature overnight.

*Work-up:* Solvent was removed *in vacuo* and the resulting pale brown solid was extracted into toluene (10 ml) and filtered to afford a dark brown solution. The volume of the solution was reduced *in vacuo* to 2 ml and stored at  $-30\text{ }^\circ\text{C}$  for 24 hrs to afford dark brown crystals, which were isolated by filtration, washed with hexanes ( $3 \times 2$  ml) and dried *in vacuo* for 30 mins. Yield: 38 mg (8%). Assaying the toluene extract before crystallisation by  $^1\text{H}$  NMR spectroscopy, with  $2,4,6\text{-Bu}_3\text{C}_6\text{H}_3$  as an internal standard, showed that **3** is obtained in 50% crude yield. The preparation of the D-analogue of **3**, **3D**, was accomplished by identical procedures with essentially identical outcomes except  $\text{KAsD}_2$  (see below) was used in place of  $\text{KAsH}_2$ .

*Characterisation data for 3:* Anal. calc'd for  $\text{C}_{66}\text{H}_{152}\text{As}_2\text{N}_8\text{Si}_6\text{U}_2 \cdot 0.8\text{C}_7\text{H}_8$ : C 44.65%; H 8.29%; N 5.82%. Found: C 45.03%; H 8.47%; N 6.24%.  $^1\text{H}$  NMR (THF- $d_8$ , 298 K):  $\delta$  5.35 (s, br, FWHM = 99 Hz, 126 H,  $\text{Pr}^i_3\text{Si}$ ), 6.20 (s, br, FWHM = 66 Hz, 24 H,  $\text{CH}_2$ ) ppm. AsH resonance(s) not observed.  $^{29}\text{Si}\{^1\text{H}\}$  NMR signal not observed due to lack of solubility.  $\mu_{\text{eff}}$  (Evans method, THF- $d_8$ , 298 K): 4.63  $\mu_{\text{B}}$ . FTIR (ATR-IR):  $\nu$  2069 (w), 2029 (w, br, As-H stretch), 1632 (w), 1581 (w), 1557 (w), 1540 (w), 1402 (s), 1302 (w), 1201 (w), 1046 (s), 931 (m), 904 (w), 672 (s), 652 (m), 633 (m), 575 (w), 561 (w), 541 (w), 518 (w)  $\text{cm}^{-1}$ .

## Synthesis of $KAsD_2$

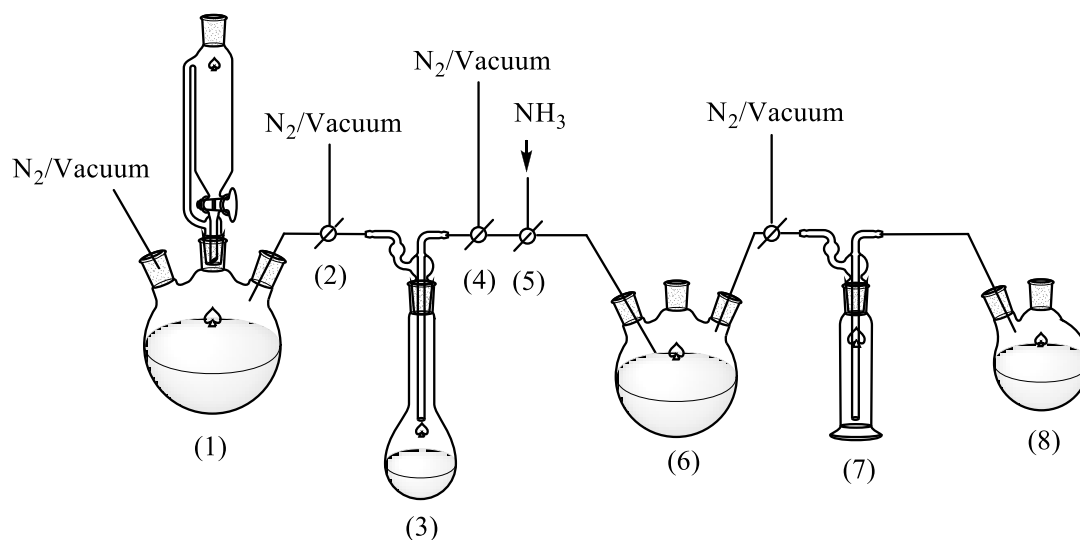

**Figure S1.** Apparatus used for the synthesis of  $KAsD_2$ .

$LiAlD_4$  (4.48 g, 106.71 mmol) was added in flask (1), the flask was cooled to  $-60\text{ }^\circ\text{C}$  and THF (50 ml) was added. A solution of  $AsCl_3$  (6.45 g, 3 ml, 35.57 mmol) in THF (5 ml) was filled into the dropping funnel. The cooling trap (3) was cooled with liquid nitrogen and the pressure in (1) and (3) was reduced to 550 mbar. The  $AsCl_3$  solution was slowly added (dropwise) to the vigorously stirred  $LiAlD_4$  solution. After the addition the temperature was slowly raised to  $-40\text{ }^\circ\text{C}$  and the pressure slowly decreased to 0.1 mbar. After the evolution of  $AsD_3$  was finished, potassium (0.9 g, 23.01 mmol) was placed in flask (6) and  $NH_3$  (ca 150 ml) was condensed in the flask. In flask (8) a  $KMnO_4$  solution in deoxygenated water was introduced. Subsequently, the three-way stopcock (4) was opened to the cooling trap containing  $AsD_3$  and a slow stream of  $N_2$  was passed through the apparatus starting from the three-way stopcock (2). The temperature of the cooling trap (3) was allowed to rise to room temperature, while the  $AsD_3$  was passed through the blue  $K/NH_3$  solution. The reaction is finished when the intense blue colour changes to bright yellow. The stream of  $N_2$  is maintained for an additional 5 minutes. It has to be ensured that the cooling trap (3) reaches room temperature in order to ensure that all  $AsD_3$  is transferred to (6). Subsequently, from flask (6) the  $NH_3$  was slowly evaporated leading to a yellowish-light orange powder of  $KAsD_2$  (2.30 g, 19.49 mmol). The reaction is quantitative with respect to K used.

## Spectroscopy, Magnetism, and Crystallography

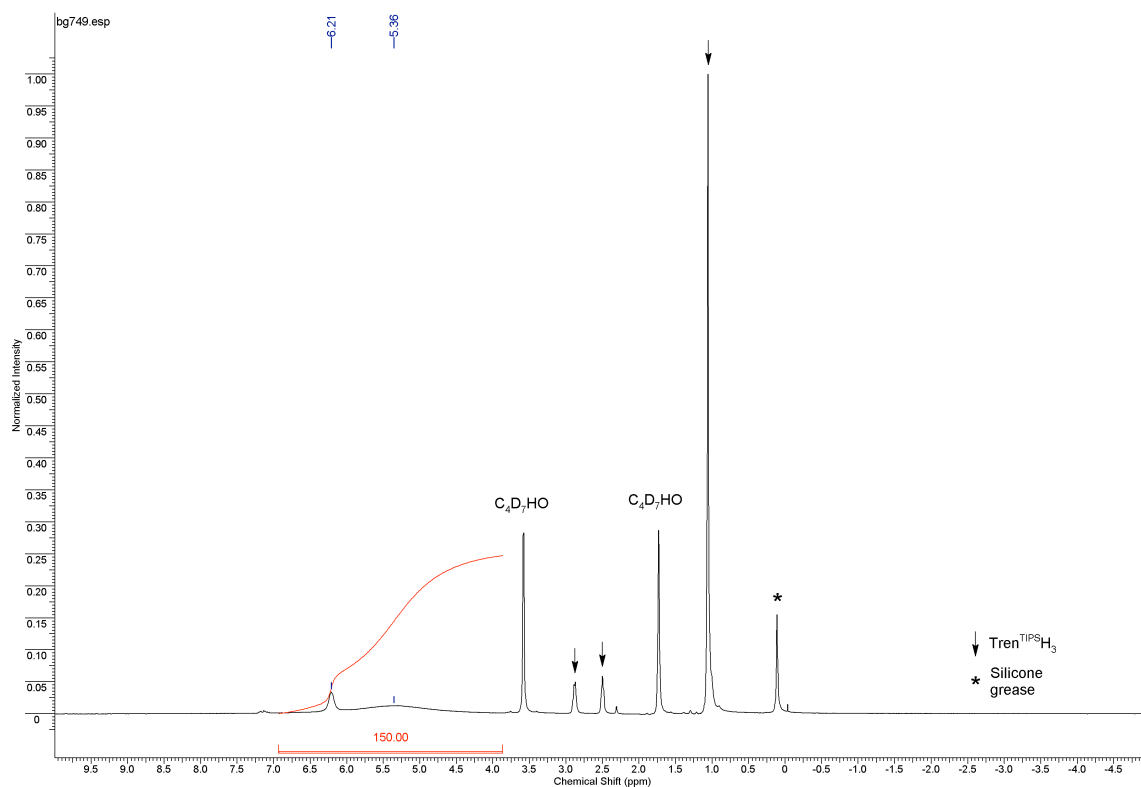

Figure S2.  $^1\text{H}$  NMR spectrum of 3 in  $D_8\text{-THF}$ .

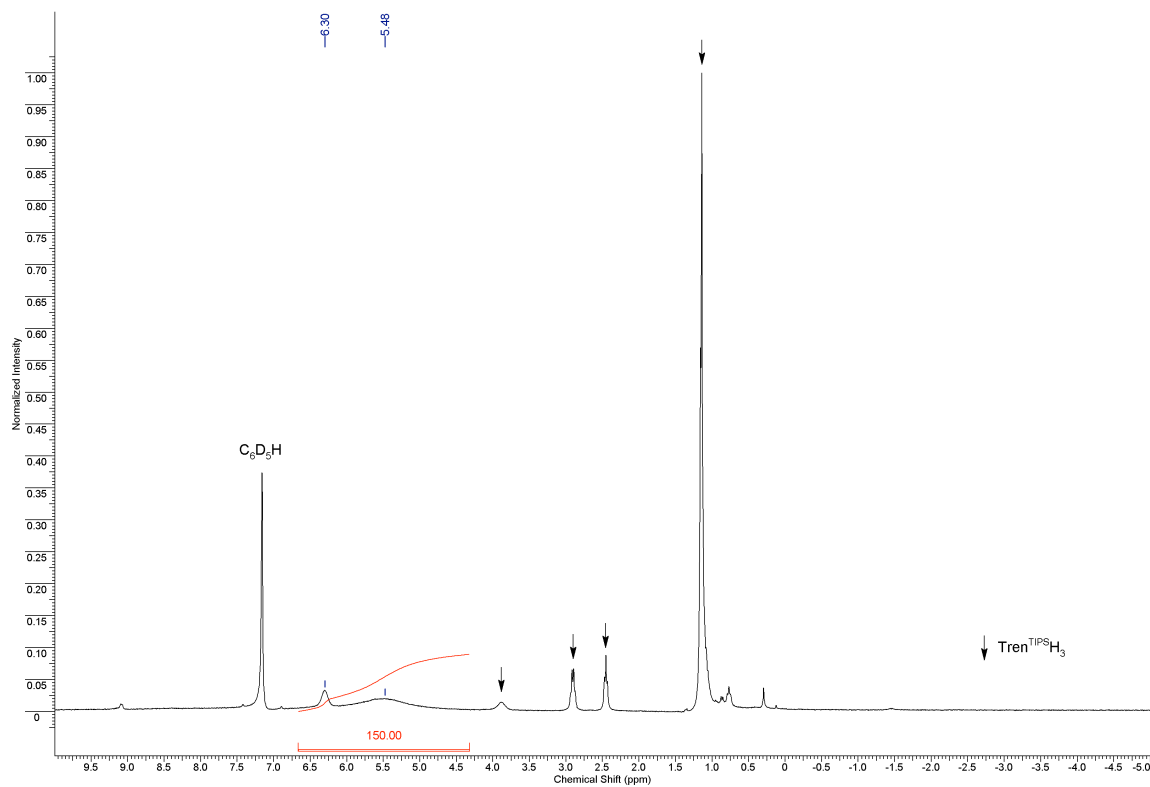

Figure S3.  $^1\text{H}$  NMR spectrum of 3D in  $D_6\text{-benzene}$ .

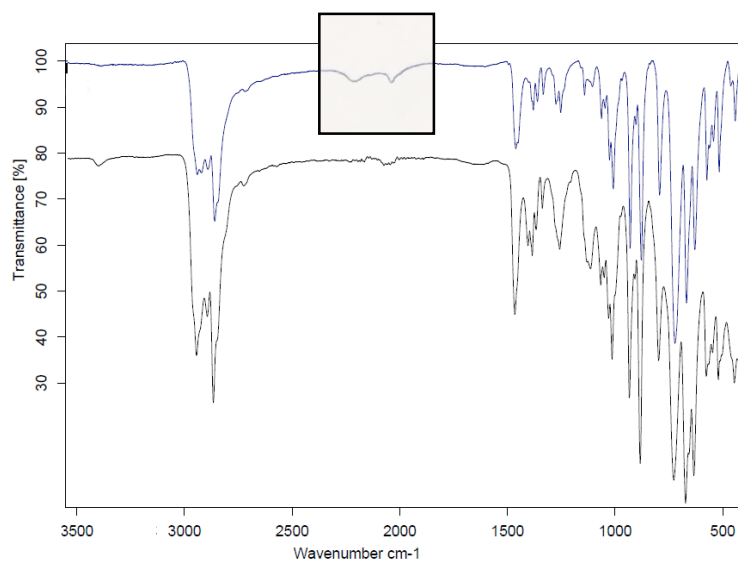

**Figure S4.** ATR-IR spectra of **3** (blue) and **3D** (black) with zoom in for As-H region of **3**.

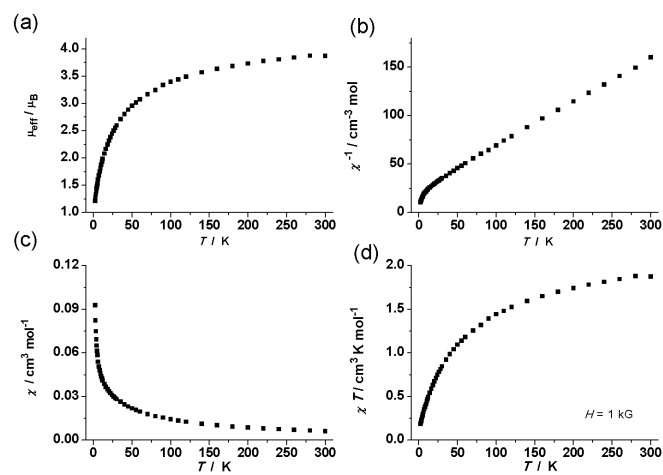

**Figure S5.** (a)  $\mu_{eff}$  vs  $T$ , (b)  $1/\chi$  vs  $T$ , (c)  $\chi$  vs  $T$ , and (d)  $\chi T$  vs  $T$  for **3**.

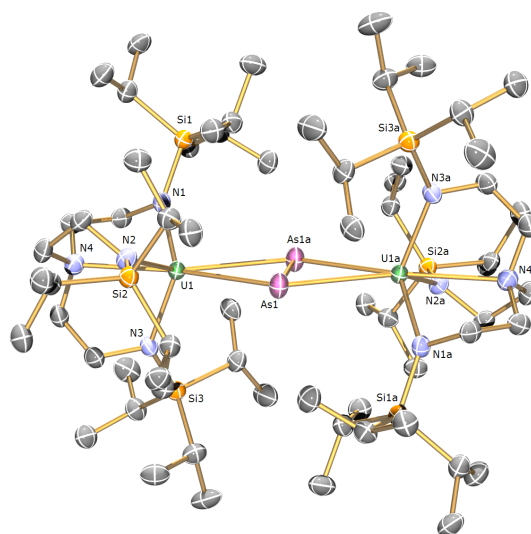

**Figure S6.** Molecular structure of **4**.

**Table S1. Experimental X-ray crystallographic details for 3 (CCDC-1403870).**

|                                                                            |                                                                                                                                                                                                                                                                                                                                                                                  |
|----------------------------------------------------------------------------|----------------------------------------------------------------------------------------------------------------------------------------------------------------------------------------------------------------------------------------------------------------------------------------------------------------------------------------------------------------------------------|
| Chemical formula                                                           | C <sub>66</sub> H <sub>152</sub> As <sub>2</sub> N <sub>8</sub> Si <sub>6</sub> U <sub>2</sub>                                                                                                                                                                                                                                                                                   |
| $M_r$                                                                      | 1852.39                                                                                                                                                                                                                                                                                                                                                                          |
| Crystal system, space group                                                | Monoclinic, <i>C2/c</i>                                                                                                                                                                                                                                                                                                                                                          |
| Temperature (K)                                                            | 120                                                                                                                                                                                                                                                                                                                                                                              |
| $a, b, c$ (Å)                                                              | 13.02406 (19), 23.0187 (3), 27.4687 (4)                                                                                                                                                                                                                                                                                                                                          |
| $\beta$ (°)                                                                | 91.9142 (14)                                                                                                                                                                                                                                                                                                                                                                     |
| $V$ (Å <sup>3</sup> )                                                      | 8230.4 (2)                                                                                                                                                                                                                                                                                                                                                                       |
| $Z$                                                                        | 4                                                                                                                                                                                                                                                                                                                                                                                |
| Radiation type                                                             | Cu $K\alpha$                                                                                                                                                                                                                                                                                                                                                                     |
| $\mu$ (mm <sup>-1</sup> )                                                  | 13.02                                                                                                                                                                                                                                                                                                                                                                            |
| Crystal size (mm)                                                          | 0.20 × 0.14 × 0.07                                                                                                                                                                                                                                                                                                                                                               |
| Diffractometer                                                             | GV1000, Atlas diffractometer                                                                                                                                                                                                                                                                                                                                                     |
| Absorption correction                                                      | Multi-scan <i>CrysAlis PRO</i> , Agilent Technologies, Version 1.171.37.31 (release 14-01-2014 <i>CrysAlis171 .NET</i> ) (compiled Jan 14 2014,18:38:05) Empirical absorption correction using spherical harmonics, implemented in SCALE3 ABSPACK scaling algorithm. Empirical absorption correction using spherical harmonics, implemented in SCALE3 ABSPACK scaling algorithm. |
| $T_{\min}, T_{\max}$                                                       | 0.381, 1.000                                                                                                                                                                                                                                                                                                                                                                     |
| No. of measured, independent and observed [ $I > 2\sigma(I)$ ] reflections | 31532, 8238, 7831                                                                                                                                                                                                                                                                                                                                                                |
| $R_{\text{int}}$                                                           | 0.031                                                                                                                                                                                                                                                                                                                                                                            |
| $(\sin \theta/\lambda)_{\text{max}}$ (Å <sup>-1</sup> )                    | 0.624                                                                                                                                                                                                                                                                                                                                                                            |
| $R[F^2 > 2\sigma(F^2)], wR(F^2), S$                                        | 0.035, 0.086, 1.04                                                                                                                                                                                                                                                                                                                                                               |
| No. of reflections                                                         | 8238                                                                                                                                                                                                                                                                                                                                                                             |
| No. of parameters                                                          | 444                                                                                                                                                                                                                                                                                                                                                                              |
| No. of restraints                                                          | 734                                                                                                                                                                                                                                                                                                                                                                              |
| H-atom treatment                                                           | H atoms treated by a mixture of independent and constrained refinement                                                                                                                                                                                                                                                                                                           |
| $\Delta\rho_{\text{max}}, \Delta\rho_{\text{min}}$ (e Å <sup>-3</sup> )    | 4.50, -2.71                                                                                                                                                                                                                                                                                                                                                                      |

Computer programs: *CrysAlis PRO*, Agilent Technologies, Version 1.171.37.31 (release 14-01-2014 *CrysAlis171 .NET*) (compiled Jan 14 2014,18:38:05), *SHELXS* (Sheldrick, 2008), *SHELXL* (Sheldrick, 2008), Olex2 (Dolomanov *et al.*, 2009).

**Table S2. Bond lengths (Å) and angles (°) for 3. Symmetry code: -x, y, -z+1/2.**

|                      |             |          |            |
|----------------------|-------------|----------|------------|
| U1—As1 <sup>i</sup>  | 3.1203 (7)  | C18—H18  | 1.0000     |
| U1—As1               | 3.1273 (7)  | C18—C19  | 1.522 (9)  |
| U1—N1                | 2.256 (4)   | C18—C20  | 1.533 (9)  |
| U1—N2                | 2.273 (4)   | C19—H19A | 0.9800     |
| U1—N3                | 2.261 (4)   | C19—H19B | 0.9800     |
| U1—N4                | 2.709 (4)   | C19—H19C | 0.9800     |
| As1—U1 <sup>i</sup>  | 3.1203 (7)  | C20—H20A | 0.9800     |
| As1—As1 <sup>i</sup> | 2.4102 (13) | C20—H20B | 0.9800     |
| As1—H1A              | 1.32 (3)    | C20—H20C | 0.9800     |
| As1—H1B              | 1.32 (3)    | C21—H21A | 0.9900     |
| N1—Si1               | 1.752 (4)   | C21—H21B | 0.9900     |
| N1—C10               | 1.490 (6)   | C21—C22  | 1.510 (7)  |
| Si1—C1               | 1.895 (6)   | C22—H22A | 0.9900     |
| Si1—C4               | 1.910 (5)   | C22—H22B | 0.9900     |
| Si1—C7               | 1.898 (6)   | C22—N4   | 1.476 (7)  |
| C1—H1                | 1.0000      | N3—Si3   | 1.741 (4)  |
| C1—C2                | 1.532 (8)   | N3—C32   | 1.489 (7)  |
| C1—C3                | 1.544 (8)   | Si3—C23  | 1.896 (6)  |
| C2—H2A               | 0.9800      | Si3—C26  | 1.907 (7)  |
| C2—H2B               | 0.9800      | Si3—C29  | 1.949 (10) |
| C2—H2C               | 0.9800      | Si3—C29A | 1.892 (10) |
| C3—H3A               | 0.9800      | C23—H23  | 1.0000     |
| C3—H3B               | 0.9800      | C23—C24  | 1.542 (9)  |
| C3—H3C               | 0.9800      | C23—C25  | 1.530 (8)  |
| C4—H4                | 1.0000      | C24—H24A | 0.9800     |
| C4—C5                | 1.547 (8)   | C24—H24B | 0.9800     |
| C4—C6                | 1.532 (8)   | C24—H24C | 0.9800     |
| C5—H5A               | 0.9800      | C25—H25A | 0.9800     |
| C5—H5B               | 0.9800      | C25—H25B | 0.9800     |
| C5—H5C               | 0.9800      | C25—H25C | 0.9800     |
| C6—H6A               | 0.9800      | C26—H26  | 1.0000     |
| C6—H6B               | 0.9800      | C26—C27  | 1.534 (9)  |
| C6—H6C               | 0.9800      | C26—C28  | 1.532 (10) |
| C7—H7A               | 1.0000      | C27—H27A | 0.9800     |
| C7—H7B               | 1.0000      | C27—H27B | 0.9800     |
| C7—C8                | 1.519 (8)   | C27—H27C | 0.9800     |
| C7—C9                | 1.437 (11)  | C28—H28A | 0.9800     |
| C7—C9A               | 1.533 (10)  | C28—H28B | 0.9800     |
| C8—H8A               | 0.9800      | C28—H28C | 0.9800     |



|                          |             |              |            |
|--------------------------|-------------|--------------|------------|
| C8—H8B                   | 0.9800      | C29—H29      | 1.0000     |
| C8—H8C                   | 0.9800      | C29—C30      | 1.536 (12) |
| C10—H10A                 | 0.9900      | C29—C31      | 1.548 (12) |
| C10—H10B                 | 0.9900      | C29A—H29A    | 1.0000     |
| C10—C11                  | 1.517 (7)   | C29A—C30A    | 1.525 (12) |
| C11—H11A                 | 0.9900      | C29A—C31A    | 1.538 (13) |
| C11—H11B                 | 0.9900      | C30—H30A     | 0.9800     |
| C11—N4                   | 1.484 (7)   | C30—H30B     | 0.9800     |
| N2—Si2                   | 1.746 (4)   | C30—H30C     | 0.9800     |
| N2—C21                   | 1.486 (6)   | C30A—H30D    | 0.9800     |
| Si2—C12                  | 1.895 (5)   | C30A—H30E    | 0.9800     |
| Si2—C15                  | 1.918 (6)   | C30A—H30F    | 0.9800     |
| Si2—C18                  | 1.898 (6)   | C31A—H31A    | 0.9800     |
| C12—H12                  | 1.0000      | C31A—H31B    | 0.9800     |
| C12—C13                  | 1.540 (7)   | C31A—H31C    | 0.9800     |
| C12—C14                  | 1.526 (8)   | C32—H32A     | 0.9900     |
| C13—H13A                 | 0.9800      | C32—H32B     | 0.9900     |
| C13—H13B                 | 0.9800      | C32—C33      | 1.508 (7)  |
| C13—H13C                 | 0.9800      | C33—H33A     | 0.9900     |
| C14—H14A                 | 0.9800      | C33—H33B     | 0.9900     |
| C14—H14B                 | 0.9800      | C33—N4       | 1.494 (7)  |
| C14—H14C                 | 0.9800      | C9—H9A       | 0.9800     |
| C15—H15                  | 1.0000      | C9—H9B       | 0.9800     |
| C15—C16                  | 1.539 (9)   | C9—H9C       | 0.9800     |
| C15—C17                  | 1.537 (8)   | C9A—H9AA     | 0.9800     |
| C16—H16A                 | 0.9800      | C9A—H9AB     | 0.9800     |
| C16—H16B                 | 0.9800      | C9A—H9AC     | 0.9800     |
| C16—H16C                 | 0.9800      | C31—H31D     | 0.9800     |
| C17—H17A                 | 0.9800      | C31—H31E     | 0.9800     |
| C17—H17B                 | 0.9800      | C31—H31F     | 0.9800     |
| C17—H17C                 | 0.9800      |              |            |
|                          |             |              |            |
| As1 <sup>i</sup> —U1—As1 | 45.38 (2)   | Si2—C18—H18  | 106.8      |
| N1—U1—As1                | 116.90 (11) | C19—C18—Si2  | 113.0 (4)  |
| N1—U1—As1 <sup>i</sup>   | 99.66 (10)  | C19—C18—H18  | 106.8      |
| N1—U1—N2                 | 109.51 (15) | C19—C18—C20  | 109.3 (6)  |
| N1—U1—N3                 | 105.95 (15) | C20—C18—Si2  | 113.8 (4)  |
| N1—U1—N4                 | 69.54 (14)  | C20—C18—H18  | 106.8      |
| N2—U1—As1                | 90.74 (11)  | C18—C19—H19A | 109.5      |
| N2—U1—As1 <sup>i</sup>   | 135.45 (11) | C18—C19—H19B | 109.5      |

|                                       |             |               |           |
|---------------------------------------|-------------|---------------|-----------|
| N2—U1—N4                              | 68.84 (14)  | C18—C19—H19C  | 109.5     |
| N3—U1—As1                             | 122.81 (11) | H19A—C19—H19B | 109.5     |
| N3—U1—As1 <sup>i</sup>                | 93.44 (11)  | H19A—C19—H19C | 109.5     |
| N3—U1—N2                              | 109.29 (15) | H19B—C19—H19C | 109.5     |
| N3—U1—N4                              | 69.68 (14)  | C18—C20—H20A  | 109.5     |
| N4—U1—As1                             | 159.32 (9)  | C18—C20—H20B  | 109.5     |
| N4—U1—As1 <sup>i</sup>                | 155.29 (9)  | C18—C20—H20C  | 109.5     |
| U1 <sup>i</sup> —As1—U1               | 134.42 (2)  | H20A—C20—H20B | 109.5     |
| U1 <sup>i</sup> —As1—H1A              | 80.6 (4)    | H20A—C20—H20C | 109.5     |
| U1—As1—H1A                            | 80.3 (4)    | H20B—C20—H20C | 109.5     |
| U1—As1—H1B                            | 84.1 (4)    | N2—C21—H21A   | 109.9     |
| U1 <sup>i</sup> —As1—H1B              | 84.4 (4)    | N2—C21—H21B   | 109.9     |
| As1 <sup>i</sup> —As1—U1 <sup>i</sup> | 67.46 (3)   | N2—C21—C22    | 109.1 (4) |
| As1 <sup>i</sup> —As1—U1              | 67.16 (3)   | H21A—C21—H21B | 108.3     |
| As1 <sup>i</sup> —As1—H1A             | 69.8 (4)    | C22—C21—H21A  | 109.9     |
| As1 <sup>i</sup> —As1—H1B             | 69.9 (4)    | C22—C21—H21B  | 109.9     |
| H1A—As1—H1B                           | 139.7 (8)   | C21—C22—H22A  | 110.1     |
| Si1—N1—U1                             | 139.5 (2)   | C21—C22—H22B  | 110.1     |
| C10—N1—U1                             | 106.4 (3)   | H22A—C22—H22B | 108.4     |
| C10—N1—Si1                            | 114.1 (3)   | N4—C22—C21    | 107.9 (4) |
| N1—Si1—C1                             | 111.2 (2)   | N4—C22—H22A   | 110.1     |
| N1—Si1—C4                             | 109.8 (2)   | N4—C22—H22B   | 110.1     |
| N1—Si1—C7                             | 108.6 (2)   | Si3—N3—U1     | 135.6 (2) |
| C1—Si1—C4                             | 111.1 (3)   | C32—N3—U1     | 109.2 (3) |
| C1—Si1—C7                             | 107.2 (3)   | C32—N3—Si3    | 115.2 (3) |
| C7—Si1—C4                             | 108.9 (3)   | N3—Si3—C23    | 109.5 (2) |
| Si1—C1—H1                             | 106.6       | N3—Si3—C26    | 109.1 (3) |
| C2—C1—Si1                             | 116.6 (4)   | N3—Si3—C29    | 106.6 (4) |
| C2—C1—H1                              | 106.6       | N3—Si3—C29A   | 114.4 (4) |
| C2—C1—C3                              | 108.3 (5)   | C23—Si3—C26   | 111.7 (3) |
| C3—C1—Si1                             | 111.6 (4)   | C23—Si3—C29   | 100.9 (4) |
| C3—C1—H1                              | 106.6       | C26—Si3—C29   | 118.6 (4) |
| C1—C2—H2A                             | 109.5       | C29A—Si3—C23  | 114.7 (4) |
| C1—C2—H2B                             | 109.5       | C29A—Si3—C26  | 96.8 (4)  |
| C1—C2—H2C                             | 109.5       | Si3—C23—H23   | 106.7     |
| H2A—C2—H2B                            | 109.5       | C24—C23—Si3   | 111.8 (4) |
| H2A—C2—H2C                            | 109.5       | C24—C23—H23   | 106.7     |
| H2B—C2—H2C                            | 109.5       | C25—C23—Si3   | 115.3 (4) |
| C1—C3—H3A                             | 109.5       | C25—C23—H23   | 106.7     |
| C1—C3—H3B                             | 109.5       | C25—C23—C24   | 109.2 (5) |

|             |           |                |            |
|-------------|-----------|----------------|------------|
| C1—C3—H3C   | 109.5     | C23—C24—H24A   | 109.5      |
| H3A—C3—H3B  | 109.5     | C23—C24—H24B   | 109.5      |
| H3A—C3—H3C  | 109.5     | C23—C24—H24C   | 109.5      |
| H3B—C3—H3C  | 109.5     | H24A—C24—H24B  | 109.5      |
| Si1—C4—H4   | 106.0     | H24A—C24—H24C  | 109.5      |
| C5—C4—Si1   | 113.9 (4) | H24B—C24—H24C  | 109.5      |
| C5—C4—H4    | 106.0     | C23—C25—H25A   | 109.5      |
| C6—C4—Si1   | 115.1 (4) | C23—C25—H25B   | 109.5      |
| C6—C4—H4    | 106.0     | C23—C25—H25C   | 109.5      |
| C6—C4—C5    | 109.0 (5) | H25A—C25—H25B  | 109.5      |
| C4—C5—H5A   | 109.5     | H25A—C25—H25C  | 109.5      |
| C4—C5—H5B   | 109.5     | H25B—C25—H25C  | 109.5      |
| C4—C5—H5C   | 109.5     | Si3—C26—H26    | 105.5      |
| H5A—C5—H5B  | 109.5     | C27—C26—Si3    | 116.2 (6)  |
| H5A—C5—H5C  | 109.5     | C27—C26—H26    | 105.5      |
| H5B—C5—H5C  | 109.5     | C28—C26—Si3    | 114.5 (4)  |
| C4—C6—H6A   | 109.5     | C28—C26—H26    | 105.5      |
| C4—C6—H6B   | 109.5     | C28—C26—C27    | 108.7 (6)  |
| C4—C6—H6C   | 109.5     | C26—C27—H27A   | 109.5      |
| H6A—C6—H6B  | 109.5     | C26—C27—H27B   | 109.5      |
| H6A—C6—H6C  | 109.5     | C26—C27—H27C   | 109.5      |
| H6B—C6—H6C  | 109.5     | H27A—C27—H27B  | 109.5      |
| Si1—C7—H7A  | 105.6     | H27A—C27—H27C  | 109.5      |
| Si1—C7—H7B  | 100.3     | H27B—C27—H27C  | 109.5      |
| C8—C7—Si1   | 114.1 (4) | C26—C28—H28A   | 109.5      |
| C8—C7—H7A   | 105.6     | C26—C28—H28B   | 109.5      |
| C8—C7—H7B   | 100.3     | C26—C28—H28C   | 109.5      |
| C8—C7—C9A   | 116.5 (7) | H28A—C28—H28B  | 109.5      |
| C9—C7—Si1   | 117.5 (6) | H28A—C28—H28C  | 109.5      |
| C9—C7—H7A   | 105.6     | H28B—C28—H28C  | 109.5      |
| C9—C7—C8    | 107.4 (7) | Si3—C29—H29    | 106.1      |
| C9A—C7—Si1  | 119.9 (6) | C30—C29—Si3    | 110.7 (8)  |
| C9A—C7—H7B  | 100.3     | C30—C29—H29    | 106.1      |
| C7—C8—H8A   | 109.5     | C30—C29—C31    | 108.7 (9)  |
| C7—C8—H8B   | 109.5     | C31—C29—Si3    | 118.2 (7)  |
| C7—C8—H8C   | 109.5     | C31—C29—H29    | 106.1      |
| H8A—C8—H8B  | 109.5     | Si3—C29A—H29A  | 107.4      |
| H8A—C8—H8C  | 109.5     | C30A—C29A—Si3  | 116.1 (8)  |
| H8B—C8—H8C  | 109.5     | C30A—C29A—H29A | 107.4      |
| N1—C10—H10A | 109.8     | C30A—C29A—C31A | 111.1 (10) |

|               |           |                |           |
|---------------|-----------|----------------|-----------|
| N1—C10—H10B   | 109.8     | C31A—C29A—Si3  | 107.1 (7) |
| N1—C10—C11    | 109.4 (4) | C31A—C29A—H29A | 107.4     |
| H10A—C10—H10B | 108.2     | C29—C30—H30A   | 109.5     |
| C11—C10—H10A  | 109.8     | C29—C30—H30B   | 109.5     |
| C11—C10—H10B  | 109.8     | C29—C30—H30C   | 109.5     |
| C10—C11—H11A  | 110.3     | H30A—C30—H30B  | 109.5     |
| C10—C11—H11B  | 110.3     | H30A—C30—H30C  | 109.5     |
| H11A—C11—H11B | 108.5     | H30B—C30—H30C  | 109.5     |
| N4—C11—C10    | 107.3 (4) | C29A—C30A—H30D | 109.5     |
| N4—C11—H11A   | 110.3     | C29A—C30A—H30E | 109.5     |
| N4—C11—H11B   | 110.3     | C29A—C30A—H30F | 109.5     |
| Si2—N2—U1     | 138.7 (2) | H30D—C30A—H30E | 109.5     |
| C21—N2—U1     | 107.6 (3) | H30D—C30A—H30F | 109.5     |
| C21—N2—Si2    | 113.6 (3) | H30E—C30A—H30F | 109.5     |
| N2—Si2—C12    | 110.3 (2) | C29A—C31A—H31A | 109.5     |
| N2—Si2—C15    | 109.4 (2) | C29A—C31A—H31B | 109.5     |
| N2—Si2—C18    | 112.1 (2) | C29A—C31A—H31C | 109.5     |
| C12—Si2—C15   | 111.7 (2) | H31A—C31A—H31B | 109.5     |
| C12—Si2—C18   | 107.2 (3) | H31A—C31A—H31C | 109.5     |
| C18—Si2—C15   | 106.1 (3) | H31B—C31A—H31C | 109.5     |
| Si2—C12—H12   | 106.4     | N3—C32—H32A    | 109.7     |
| C13—C12—Si2   | 111.3 (4) | N3—C32—H32B    | 109.7     |
| C13—C12—H12   | 106.4     | N3—C32—C33     | 109.7 (4) |
| C14—C12—Si2   | 115.9 (4) | H32A—C32—H32B  | 108.2     |
| C14—C12—H12   | 106.4     | C33—C32—H32A   | 109.7     |
| C14—C12—C13   | 109.8 (5) | C33—C32—H32B   | 109.7     |
| C12—C13—H13A  | 109.5     | C32—C33—H33A   | 109.9     |
| C12—C13—H13B  | 109.5     | C32—C33—H33B   | 109.9     |
| C12—C13—H13C  | 109.5     | H33A—C33—H33B  | 108.3     |
| H13A—C13—H13B | 109.5     | N4—C33—C32     | 108.9 (4) |
| H13A—C13—H13C | 109.5     | N4—C33—H33A    | 109.9     |
| H13B—C13—H13C | 109.5     | N4—C33—H33B    | 109.9     |
| C12—C14—H14A  | 109.5     | C11—N4—U1      | 106.4 (3) |
| C12—C14—H14B  | 109.5     | C11—N4—C33     | 111.6 (4) |
| C12—C14—H14C  | 109.5     | C22—N4—U1      | 107.1 (3) |
| H14A—C14—H14B | 109.5     | C22—N4—C11     | 112.9 (4) |
| H14A—C14—H14C | 109.5     | C22—N4—C33     | 111.9 (4) |
| H14B—C14—H14C | 109.5     | C33—N4—U1      | 106.3 (3) |
| Si2—C15—H15   | 105.7     | C7—C9—H9A      | 109.5     |
| C16—C15—Si2   | 114.5 (4) | C7—C9—H9B      | 109.5     |

|               |           |               |       |
|---------------|-----------|---------------|-------|
| C16—C15—H15   | 105.7     | C7—C9—H9C     | 109.5 |
| C17—C15—Si2   | 115.6 (4) | H9A—C9—H9B    | 109.5 |
| C17—C15—H15   | 105.7     | H9A—C9—H9C    | 109.5 |
| C17—C15—C16   | 108.9 (5) | H9B—C9—H9C    | 109.5 |
| C15—C16—H16A  | 109.5     | C7—C9A—H9AA   | 109.5 |
| C15—C16—H16B  | 109.5     | C7—C9A—H9AB   | 109.5 |
| C15—C16—H16C  | 109.5     | C7—C9A—H9AC   | 109.5 |
| H16A—C16—H16B | 109.5     | H9AA—C9A—H9AB | 109.5 |
| H16A—C16—H16C | 109.5     | H9AA—C9A—H9AC | 109.5 |
| H16B—C16—H16C | 109.5     | H9AB—C9A—H9AC | 109.5 |
| C15—C17—H17A  | 109.5     | C29—C31—H31D  | 109.5 |
| C15—C17—H17B  | 109.5     | C29—C31—H31E  | 109.5 |
| C15—C17—H17C  | 109.5     | C29—C31—H31F  | 109.5 |
| H17A—C17—H17B | 109.5     | H31D—C31—H31E | 109.5 |
| H17A—C17—H17C | 109.5     | H31D—C31—H31F | 109.5 |
| H17B—C17—H17C | 109.5     | H31E—C31—H31F | 109.5 |

**Table S3. Experimental X-ray crystallographic details for 4 (CCDC-1419459).**

|                                                                            |                                                                                                                                                                                                                                                                                                                                                                    |
|----------------------------------------------------------------------------|--------------------------------------------------------------------------------------------------------------------------------------------------------------------------------------------------------------------------------------------------------------------------------------------------------------------------------------------------------------------|
| Chemical formula                                                           | C <sub>66</sub> H <sub>150</sub> As <sub>2</sub> N <sub>8</sub> Si <sub>6</sub> U <sub>2</sub>                                                                                                                                                                                                                                                                     |
| $M_r$                                                                      | 1850.37                                                                                                                                                                                                                                                                                                                                                            |
| Crystal system, space group                                                | Monoclinic, $P2_1/n$                                                                                                                                                                                                                                                                                                                                               |
| Temperature (K)                                                            | 120                                                                                                                                                                                                                                                                                                                                                                |
| $a, b, c$ (Å)                                                              | 12.9072 (5), 22.4152 (7), 15.0301 (6)                                                                                                                                                                                                                                                                                                                              |
| $\beta$ (°)                                                                | 113.904 (5)                                                                                                                                                                                                                                                                                                                                                        |
| $V$ (Å <sup>3</sup> )                                                      | 3975.5 (3)                                                                                                                                                                                                                                                                                                                                                         |
| $Z$                                                                        | 2                                                                                                                                                                                                                                                                                                                                                                  |
| Radiation type                                                             | Cu $K\alpha$                                                                                                                                                                                                                                                                                                                                                       |
| $\mu$ (mm <sup>-1</sup> )                                                  | 13.47                                                                                                                                                                                                                                                                                                                                                              |
| Crystal size (mm)                                                          | 0.13 × 0.10 × 0.09                                                                                                                                                                                                                                                                                                                                                 |
| Diffractometer                                                             | GV1000, Atlas diffractometer                                                                                                                                                                                                                                                                                                                                       |
| Absorption correction                                                      | Gaussian <i>CrysAlis PRO</i> , Agilent Technologies, Version 1.171.37.33 (release 27-03-2014 <i>CrysAlis171 .NET</i> ) (compiled Mar 27 2014,17:12:48) Numerical absorption correction based on gaussian integration over a multifaceted crystal model Empirical absorption correction using spherical harmonics, implemented in SCALE3 ABSPACK scaling algorithm. |
| $T_{\min}, T_{\max}$                                                       | 0.108, 0.252                                                                                                                                                                                                                                                                                                                                                       |
| No. of measured, independent and observed [ $I > 2\sigma(I)$ ] reflections | 17159, 7884, 6866                                                                                                                                                                                                                                                                                                                                                  |
| $R_{\text{int}}$                                                           | 0.043                                                                                                                                                                                                                                                                                                                                                              |
| $(\sin \theta/\lambda)_{\text{max}}$ (Å <sup>-1</sup> )                    | 0.624                                                                                                                                                                                                                                                                                                                                                              |
| $R[F^2 > 2\sigma(F^2)], wR(F^2), S$                                        | 0.046, 0.130, 1.05                                                                                                                                                                                                                                                                                                                                                 |
| No. of reflections                                                         | 7884                                                                                                                                                                                                                                                                                                                                                               |
| No. of parameters                                                          | 397                                                                                                                                                                                                                                                                                                                                                                |
| H-atom treatment                                                           | H-atom parameters constrained                                                                                                                                                                                                                                                                                                                                      |
| $\Delta\rho_{\text{max}}, \Delta\rho_{\text{min}}$ (e Å <sup>-3</sup> )    | 3.76, -1.47                                                                                                                                                                                                                                                                                                                                                        |

Computer programs: *CrysAlis PRO*, Agilent Technologies, Version 1.171.37.33 (release 27-03-2014 *CrysAlis171 .NET*) (compiled Mar 27 2014,17:12:48), *SHELXS* (Sheldrick, 2008), *SHELXL* (Sheldrick, 2008), *Olex2* (Dolomanov *et al.*, 2009).

**Table S4. Bond lengths (Å) and angles (°) for 4. Symmetry code: -x, -y, -z.**

|                      |             |          |            |
|----------------------|-------------|----------|------------|
| U1—As1               | 3.0357 (7)  | C15—C16  | 1.524 (11) |
| U1—As1 <sup>i</sup>  | 3.0497 (8)  | C15—C17  | 1.530 (11) |
| U1—N1                | 2.270 (5)   | C16—H16A | 0.9800     |
| U1—N2                | 2.278 (5)   | C16—H16B | 0.9800     |
| U1—N3                | 2.266 (5)   | C16—H16C | 0.9800     |
| U1—N4                | 2.685 (5)   | C17—H17A | 0.9800     |
| As1—U1 <sup>i</sup>  | 3.0497 (7)  | C17—H17B | 0.9800     |
| As1—As1 <sup>i</sup> | 2.2568 (14) | C17—H17C | 0.9800     |
| N1—Si1               | 1.744 (5)   | C18—H18  | 1.0000     |
| N1—C10               | 1.490 (7)   | C18—C19  | 1.532 (11) |
| Si1—C1               | 1.894 (7)   | C18—C20  | 1.541 (11) |
| Si1—C4               | 1.917 (7)   | C19—H19A | 0.9800     |
| Si1—C7               | 1.912 (7)   | C19—H19B | 0.9800     |
| C1—H1                | 1.0000      | C19—H19C | 0.9800     |
| C1—C2                | 1.545 (10)  | C20—H20A | 0.9800     |
| C1—C3                | 1.558 (10)  | C20—H20B | 0.9800     |
| C2—H2A               | 0.9800      | C20—H20C | 0.9800     |
| C2—H2B               | 0.9800      | C21—H21A | 0.9900     |
| C2—H2C               | 0.9800      | C21—H21B | 0.9900     |
| C3—H3A               | 0.9800      | C21—C22  | 1.520 (10) |
| C3—H3B               | 0.9800      | C22—H22A | 0.9900     |
| C3—H3C               | 0.9800      | C22—H22B | 0.9900     |
| C4—H4                | 1.0000      | C22—N4   | 1.480 (9)  |
| C4—C5                | 1.520 (11)  | N3—Si3   | 1.753 (6)  |
| C4—C6                | 1.523 (10)  | N3—C32   | 1.499 (8)  |
| C5—H5A               | 0.9800      | Si3—C23  | 1.889 (7)  |
| C5—H5B               | 0.9800      | Si3—C26  | 1.923 (6)  |
| C5—H5C               | 0.9800      | Si3—C29  | 1.900 (7)  |
| C6—H6A               | 0.9800      | C23—H23  | 1.0000     |
| C6—H6B               | 0.9800      | C23—C24  | 1.527 (10) |
| C6—H6C               | 0.9800      | C23—C25  | 1.541 (10) |
| C7—H7                | 1.0000      | C24—H24A | 0.9800     |
| C7—C8                | 1.526 (10)  | C24—H24B | 0.9800     |
| C7—C9                | 1.526 (10)  | C24—H24C | 0.9800     |
| C8—H8A               | 0.9800      | C25—H25A | 0.9800     |
| C8—H8B               | 0.9800      | C25—H25B | 0.9800     |
| C8—H8C               | 0.9800      | C25—H25C | 0.9800     |
| C9—H9A               | 0.9800      | C26—H26  | 1.0000     |
| C9—H9B               | 0.9800      | C26—C27  | 1.519 (10) |

|                          |             |               |            |
|--------------------------|-------------|---------------|------------|
| C9—H9C                   | 0.9800      | C26—C28       | 1.540 (10) |
| C10—H10A                 | 0.9900      | C27—H27A      | 0.9800     |
| C10—H10B                 | 0.9900      | C27—H27B      | 0.9800     |
| C10—C11                  | 1.477 (10)  | C27—H27C      | 0.9800     |
| C11—H11A                 | 0.9900      | C28—H28A      | 0.9800     |
| C11—H11B                 | 0.9900      | C28—H28B      | 0.9800     |
| C11—N4                   | 1.469 (8)   | C28—H28C      | 0.9800     |
| N2—Si2                   | 1.741 (5)   | C29—H29       | 1.0000     |
| N2—C21                   | 1.471 (8)   | C29—C30       | 1.553 (9)  |
| Si2—C12                  | 1.889 (7)   | C29—C31       | 1.515 (10) |
| Si2—C15                  | 1.909 (7)   | C30—H30A      | 0.9800     |
| Si2—C18                  | 1.906 (7)   | C30—H30B      | 0.9800     |
| C12—H12                  | 1.0000      | C30—H30C      | 0.9800     |
| C12—C13                  | 1.530 (10)  | C31—H31A      | 0.9800     |
| C12—C14                  | 1.550 (10)  | C31—H31B      | 0.9800     |
| C13—H13A                 | 0.9800      | C31—H31C      | 0.9800     |
| C13—H13B                 | 0.9800      | C32—H32A      | 0.9900     |
| C13—H13C                 | 0.9800      | C32—H32B      | 0.9900     |
| C14—H14A                 | 0.9800      | C32—C33       | 1.506 (10) |
| C14—H14B                 | 0.9800      | C33—H33A      | 0.9900     |
| C14—H14C                 | 0.9800      | C33—H33B      | 0.9900     |
| C15—H15                  | 1.0000      | C33—N4        | 1.486 (9)  |
|                          |             |               |            |
| As1—U1—As1 <sup>i</sup>  | 43.54 (3)   | C17—C15—H15   | 104.2      |
| N1—U1—As1 <sup>i</sup>   | 90.70 (13)  | C15—C16—H16A  | 109.5      |
| N1—U1—As1                | 125.05 (13) | C15—C16—H16B  | 109.5      |
| N1—U1—N2                 | 110.74 (19) | C15—C16—H16C  | 109.5      |
| N1—U1—N4                 | 69.58 (18)  | H16A—C16—H16B | 109.5      |
| N2—U1—As1 <sup>i</sup>   | 109.31 (13) | H16A—C16—H16C | 109.5      |
| N2—U1—As1                | 112.37 (13) | H16B—C16—H16C | 109.5      |
| N2—U1—N4                 | 69.53 (18)  | C15—C17—H17A  | 109.5      |
| N3—U1—As1 <sup>i</sup>   | 129.20 (14) | C15—C17—H17B  | 109.5      |
| N3—U1—As1                | 89.65 (14)  | C15—C17—H17C  | 109.5      |
| N3—U1—N1                 | 109.09 (19) | H17A—C17—H17B | 109.5      |
| N3—U1—N2                 | 106.34 (19) | H17A—C17—H17C | 109.5      |
| N3—U1—N4                 | 70.31 (19)  | H17B—C17—H17C | 109.5      |
| N4—U1—As1 <sup>i</sup>   | 157.21 (12) | Si2—C18—H18   | 106.0      |
| N4—U1—As1                | 159.06 (12) | C19—C18—Si2   | 115.4 (5)  |
| U1—As1—U1 <sup>i</sup>   | 136.46 (3)  | C19—C18—H18   | 106.0      |
| As1 <sup>i</sup> —As1—U1 | 68.56 (3)   | C19—C18—C20   | 106.9 (6)  |



|                                       |           |               |           |
|---------------------------------------|-----------|---------------|-----------|
| As1 <sup>i</sup> —As1—U1 <sup>i</sup> | 67.90 (3) | C20—C18—Si2   | 115.9 (5) |
| Si1—N1—U1                             | 137.0 (3) | C20—C18—H18   | 106.0     |
| C10—N1—U1                             | 109.0 (4) | C18—C19—H19A  | 109.5     |
| C10—N1—Si1                            | 113.9 (4) | C18—C19—H19B  | 109.5     |
| N1—Si1—C1                             | 107.7 (3) | C18—C19—H19C  | 109.5     |
| N1—Si1—C4                             | 111.2 (3) | H19A—C19—H19B | 109.5     |
| N1—Si1—C7                             | 112.7 (3) | H19A—C19—H19C | 109.5     |
| C1—Si1—C4                             | 112.9 (3) | H19B—C19—H19C | 109.5     |
| C1—Si1—C7                             | 107.1 (3) | C18—C20—H20A  | 109.5     |
| C7—Si1—C4                             | 105.2 (3) | C18—C20—H20B  | 109.5     |
| Si1—C1—H1                             | 106.8     | C18—C20—H20C  | 109.5     |
| C2—C1—Si1                             | 115.4 (5) | H20A—C20—H20B | 109.5     |
| C2—C1—H1                              | 106.8     | H20A—C20—H20C | 109.5     |
| C2—C1—C3                              | 108.9 (6) | H20B—C20—H20C | 109.5     |
| C3—C1—Si1                             | 111.7 (5) | N2—C21—H21A   | 109.7     |
| C3—C1—H1                              | 106.8     | N2—C21—H21B   | 109.7     |
| C1—C2—H2A                             | 109.5     | N2—C21—C22    | 109.6 (5) |
| C1—C2—H2B                             | 109.5     | H21A—C21—H21B | 108.2     |
| C1—C2—H2C                             | 109.5     | C22—C21—H21A  | 109.7     |
| H2A—C2—H2B                            | 109.5     | C22—C21—H21B  | 109.7     |
| H2A—C2—H2C                            | 109.5     | C21—C22—H22A  | 110.3     |
| H2B—C2—H2C                            | 109.5     | C21—C22—H22B  | 110.3     |
| C1—C3—H3A                             | 109.5     | H22A—C22—H22B | 108.5     |
| C1—C3—H3B                             | 109.5     | N4—C22—C21    | 107.3 (5) |
| C1—C3—H3C                             | 109.5     | N4—C22—H22A   | 110.3     |
| H3A—C3—H3B                            | 109.5     | N4—C22—H22B   | 110.3     |
| H3A—C3—H3C                            | 109.5     | Si3—N3—U1     | 138.5 (3) |
| H3B—C3—H3C                            | 109.5     | C32—N3—U1     | 105.9 (4) |
| Si1—C4—H4                             | 105.8     | C32—N3—Si3    | 115.3 (4) |
| C5—C4—Si1                             | 114.3 (5) | N3—Si3—C23    | 108.3 (3) |
| C5—C4—H4                              | 105.8     | N3—Si3—C26    | 108.8 (3) |
| C5—C4—C6                              | 109.9 (6) | N3—Si3—C29    | 111.0 (3) |
| C6—C4—Si1                             | 114.4 (5) | C23—Si3—C26   | 110.7 (3) |
| C6—C4—H4                              | 105.8     | C23—Si3—C29   | 107.2 (3) |
| C4—C5—H5A                             | 109.5     | C29—Si3—C26   | 110.8 (3) |
| C4—C5—H5B                             | 109.5     | Si3—C23—H23   | 105.4     |
| C4—C5—H5C                             | 109.5     | C24—C23—Si3   | 112.7 (5) |
| H5A—C5—H5B                            | 109.5     | C24—C23—H23   | 105.4     |
| H5A—C5—H5C                            | 109.5     | C24—C23—C25   | 110.7 (6) |
| H5B—C5—H5C                            | 109.5     | C25—C23—Si3   | 116.3 (5) |

|               |           |               |           |
|---------------|-----------|---------------|-----------|
| C4—C6—H6A     | 109.5     | C25—C23—H23   | 105.4     |
| C4—C6—H6B     | 109.5     | C23—C24—H24A  | 109.5     |
| C4—C6—H6C     | 109.5     | C23—C24—H24B  | 109.5     |
| H6A—C6—H6B    | 109.5     | C23—C24—H24C  | 109.5     |
| H6A—C6—H6C    | 109.5     | H24A—C24—H24B | 109.5     |
| H6B—C6—H6C    | 109.5     | H24A—C24—H24C | 109.5     |
| Si1—C7—H7     | 106.8     | H24B—C24—H24C | 109.5     |
| C8—C7—Si1     | 114.9 (5) | C23—C25—H25A  | 109.5     |
| C8—C7—H7      | 106.8     | C23—C25—H25B  | 109.5     |
| C9—C7—Si1     | 111.3 (5) | C23—C25—H25C  | 109.5     |
| C9—C7—H7      | 106.8     | H25A—C25—H25B | 109.5     |
| C9—C7—C8      | 109.7 (6) | H25A—C25—H25C | 109.5     |
| C7—C8—H8A     | 109.5     | H25B—C25—H25C | 109.5     |
| C7—C8—H8B     | 109.5     | Si3—C26—H26   | 106.2     |
| C7—C8—H8C     | 109.5     | C27—C26—Si3   | 115.2 (5) |
| H8A—C8—H8B    | 109.5     | C27—C26—H26   | 106.2     |
| H8A—C8—H8C    | 109.5     | C27—C26—C28   | 110.1 (6) |
| H8B—C8—H8C    | 109.5     | C28—C26—Si3   | 112.3 (5) |
| C7—C9—H9A     | 109.5     | C28—C26—H26   | 106.2     |
| C7—C9—H9B     | 109.5     | C26—C27—H27A  | 109.5     |
| C7—C9—H9C     | 109.5     | C26—C27—H27B  | 109.5     |
| H9A—C9—H9B    | 109.5     | C26—C27—H27C  | 109.5     |
| H9A—C9—H9C    | 109.5     | H27A—C27—H27B | 109.5     |
| H9B—C9—H9C    | 109.5     | H27A—C27—H27C | 109.5     |
| N1—C10—H10A   | 109.9     | H27B—C27—H27C | 109.5     |
| N1—C10—H10B   | 109.9     | C26—C28—H28A  | 109.5     |
| H10A—C10—H10B | 108.3     | C26—C28—H28B  | 109.5     |
| C11—C10—N1    | 109.0 (5) | C26—C28—H28C  | 109.5     |
| C11—C10—H10A  | 109.9     | H28A—C28—H28B | 109.5     |
| C11—C10—H10B  | 109.9     | H28A—C28—H28C | 109.5     |
| C10—C11—H11A  | 109.5     | H28B—C28—H28C | 109.5     |
| C10—C11—H11B  | 109.5     | Si3—C29—H29   | 106.2     |
| H11A—C11—H11B | 108.1     | C30—C29—Si3   | 113.7 (4) |
| N4—C11—C10    | 110.7 (5) | C30—C29—H29   | 106.2     |
| N4—C11—H11A   | 109.5     | C31—C29—Si3   | 115.3 (5) |
| N4—C11—H11B   | 109.5     | C31—C29—H29   | 106.2     |
| Si2—N2—U1     | 135.8 (3) | C31—C29—C30   | 108.5 (6) |
| C21—N2—U1     | 109.3 (4) | C29—C30—H30A  | 109.5     |
| C21—N2—Si2    | 114.9 (4) | C29—C30—H30B  | 109.5     |
| N2—Si2—C12    | 106.3 (3) | C29—C30—H30C  | 109.5     |

|               |           |               |           |
|---------------|-----------|---------------|-----------|
| N2—Si2—C15    | 117.0 (3) | H30A—C30—H30B | 109.5     |
| N2—Si2—C18    | 110.2 (3) | H30A—C30—H30C | 109.5     |
| C12—Si2—C15   | 109.2 (3) | H30B—C30—H30C | 109.5     |
| C12—Si2—C18   | 107.0 (3) | C29—C31—H31A  | 109.5     |
| C18—Si2—C15   | 106.7 (3) | C29—C31—H31B  | 109.5     |
| Si2—C12—H12   | 106.1     | C29—C31—H31C  | 109.5     |
| C13—C12—Si2   | 115.6 (5) | H31A—C31—H31B | 109.5     |
| C13—C12—H12   | 106.1     | H31A—C31—H31C | 109.5     |
| C13—C12—C14   | 108.6 (7) | H31B—C31—H31C | 109.5     |
| C14—C12—Si2   | 113.7 (5) | N3—C32—H32A   | 109.8     |
| C14—C12—H12   | 106.1     | N3—C32—H32B   | 109.8     |
| C12—C13—H13A  | 109.5     | N3—C32—C33    | 109.3 (5) |
| C12—C13—H13B  | 109.5     | H32A—C32—H32B | 108.3     |
| C12—C13—H13C  | 109.5     | C33—C32—H32A  | 109.8     |
| H13A—C13—H13B | 109.5     | C33—C32—H32B  | 109.8     |
| H13A—C13—H13C | 109.5     | C32—C33—H33A  | 110.2     |
| H13B—C13—H13C | 109.5     | C32—C33—H33B  | 110.2     |
| C12—C14—H14A  | 109.5     | H33A—C33—H33B | 108.5     |
| C12—C14—H14B  | 109.5     | N4—C33—C32    | 107.3 (5) |
| C12—C14—H14C  | 109.5     | N4—C33—H33A   | 110.2     |
| H14A—C14—H14B | 109.5     | N4—C33—H33B   | 110.2     |
| H14A—C14—H14C | 109.5     | C11—N4—U1     | 106.1 (4) |
| H14B—C14—H14C | 109.5     | C11—N4—C22    | 111.8 (5) |
| Si2—C15—H15   | 104.2     | C11—N4—C33    | 112.3 (6) |
| C16—C15—Si2   | 117.1 (6) | C22—N4—U1     | 107.5 (4) |
| C16—C15—H15   | 104.2     | C22—N4—C33    | 112.3 (6) |
| C16—C15—C17   | 108.4 (6) | C33—N4—U1     | 106.3 (4) |
| C17—C15—Si2   | 116.9 (5) |               |           |

## Density Functional Theory Calculations

### *General*

Unrestricted geometry optimisations were performed for the full model of **3** using coordinates derived from the X-ray crystal structure; both *E* and *Z* isomers were considered, but since the *E* isomer was found to be the most stable subsequent investigations focussed on this isomer. No constraints were imposed on the structures during the geometry optimisations. The calculations were performed using the Amsterdam Density Functional (ADF) suite version 2012.01.<sup>4,5</sup> The DFT

geometry optimisations employed Slater type orbital (STO) triple- $\zeta$ -plus polarisation all-electron basis sets (from the ZORA/TZP database of the ADF suite). Scalar relativistic approaches were used within the ZORA Hamiltonian for the inclusion of relativistic effects and the local density approximation (LDA) with the correlation potential due to Vosko et al<sup>6</sup> was used in all of the calculations. Gradient corrections were performed using the functionals of Becke<sup>7</sup> and Perdew.<sup>8</sup> MOLEKEL<sup>9</sup> was used to prepare the three-dimensional plot of the electron density. Natural Bond Order (NBO) analyses were carried out with NBO 5.0.<sup>10</sup>

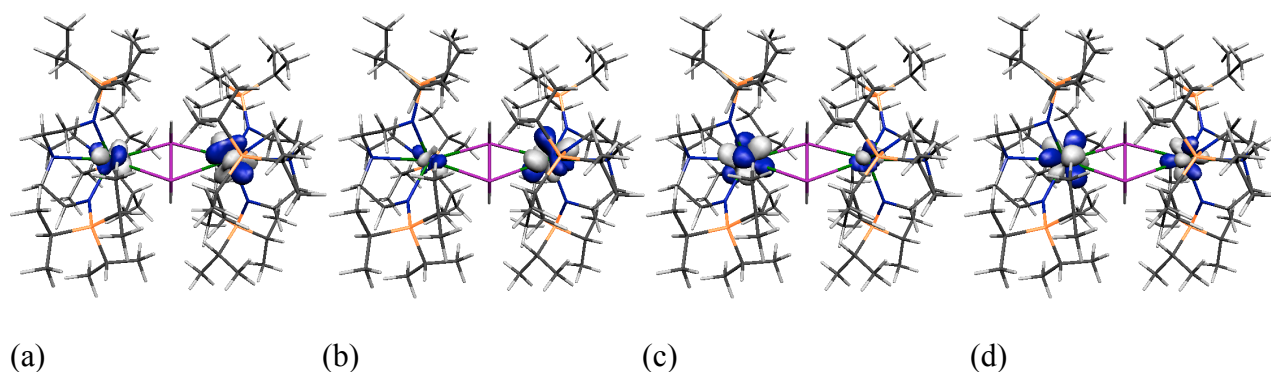

**Figure S7.** The top four  $\alpha$ -spin Kohn Sham molecular orbitals of 3: (a) HOMO (471a,  $-2.944$  eV), (b) HOMO-1 (470a,  $-2.951$ ), (c) HOMO-2 (469a,  $-2.977$  eV), (d) HOMO-3 (468a,  $-2.989$ ).

**Table S5.** Final coordinates and single point energy of the E isomer of 3 after geometry optimisation.

|      |           |           |           |      |           |           |           |
|------|-----------|-----------|-----------|------|-----------|-----------|-----------|
| 1.C  | 4.208630  | 0.936163  | -6.513490 | 19.C | -1.658240 | -5.327518 | -2.076037 |
| 2.C  | 1.081636  | -1.122586 | -5.819694 | 20.C | -1.065050 | 3.833289  | -2.178073 |
| 3.C  | 0.651898  | 1.365979  | -5.701500 | 21.C | 0.639805  | 5.670354  | -1.835186 |
| 4.C  | 4.369861  | 0.202329  | -5.163745 | 22.C | 1.675619  | -6.552902 | -1.726113 |
| 5.C  | 1.153532  | 0.131957  | -4.924978 | 23.C | 0.939819  | -7.899539 | -1.544063 |
| 6.C  | -3.386808 | -0.599204 | -4.847466 | 24.C | 3.745405  | 2.051823  | -1.787698 |
| 7.C  | 5.696831  | 0.629624  | -4.498591 | 25.C | -0.593854 | -4.272615 | -1.710094 |
| 8.C  | -3.692136 | 1.868348  | -4.389044 | 26.C | -3.986916 | -1.665981 | -1.576095 |
| 9.C  | 3.087397  | 3.185818  | -3.923419 | 27.C | -7.170414 | -0.194989 | -1.247544 |
| 10.C | -6.869168 | -0.155308 | -3.754097 | 28.C | -2.987714 | 6.620980  | -0.990370 |
| 11.C | -3.387302 | 0.493036  | -3.759436 | 29.C | 4.450044  | -4.307499 | -1.089229 |
| 12.C | 3.374102  | -2.356061 | -3.463361 | 30.C | -0.140613 | 4.522303  | -1.161381 |
| 13.C | 1.910347  | -6.296079 | -3.228783 | 31.C | -4.471169 | 2.658544  | -1.067209 |
| 14.C | 4.762785  | -2.688120 | -2.927595 | 32.C | 5.787909  | -2.269441 | -0.708071 |
| 15.C | 2.814943  | 1.969700  | -3.009945 | 33.C | 5.396192  | -0.856905 | -0.291794 |
| 16.C | -0.233070 | -3.426956 | -2.942480 | 34.C | -1.283128 | 8.007378  | 0.245211  |
| 17.C | -4.750590 | -2.740744 | -2.380918 | 35.C | -4.171912 | -1.938646 | -0.073987 |
| 18.C | -6.315055 | 0.360782  | -2.407470 | 36.C | -5.442781 | 2.899879  | 0.084665  |
|      |           |           |           | 37.C | 3.404358  | -4.370065 | 0.017393  |
|      |           |           |           | 38.C | -2.062241 | 6.673138  | 0.242869  |
|      |           |           |           | 39.C | 0.188161  | -5.773856 | 0.887005  |

|      |           |           |           |       |           |           |           |
|------|-----------|-----------|-----------|-------|-----------|-----------|-----------|
| 40.C | 5.729354  | 2.126457  | 1.511312  | 91.H  | 0.959049  | -6.260301 | -3.781556 |
| 41.C | 0.476216  | 5.576844  | 1.681021  | 92.H  | -3.532637 | 2.692734  | -3.682482 |
| 42.C | -4.271645 | 4.274606  | 1.774531  | 93.H  | 2.511954  | -7.105653 | -3.676986 |
| 43.C | -0.669188 | -4.775892 | 1.684648  | 94.H  | 5.855350  | 0.159756  | -3.517120 |
| 44.C | 1.245745  | -6.411291 | 1.811805  | 95.H  | 0.238047  | -4.027480 | -3.732985 |
| 45.C | 1.556147  | 4.488590  | 1.811177  | 96.H  | 5.197898  | -3.579463 | -3.418804 |
| 46.C | 4.505731  | 1.542946  | 2.247551  | 97.H  | 2.942895  | 4.122631  | -3.361355 |
| 47.C | -2.830777 | 4.229587  | 2.268676  | 98.H  | 2.434341  | -5.348991 | -3.423919 |
| 48.C | -5.345971 | 2.155252  | 2.446222  | 99.H  | -2.355641 | 0.548577  | -3.360297 |
| 49.C | -4.861325 | 0.710941  | 2.418601  | 100.H | -4.633179 | -2.633526 | -3.466602 |
| 50.C | 6.089324  | -1.184358 | 2.888790  | 101.H | 2.700186  | -3.197327 | -3.225757 |
| 51.C | 0.015848  | 6.029630  | 3.081410  | 102.H | -1.134217 | -2.966068 | -3.378086 |
| 52.C | 5.984119  | -2.704420 | 3.138038  | 103.H | 5.428284  | -1.839221 | -3.125154 |
| 53.C | 2.296516  | -2.281126 | 2.963646  | 104.H | -1.275096 | -6.054279 | -2.808503 |
| 54.C | 4.323399  | 2.240303  | 3.610099  | 105.H | -0.496018 | 3.512499  | -3.065866 |
| 55.C | 2.921107  | -0.920923 | 3.319662  | 106.H | 1.185881  | 5.300826  | -2.717790 |
| 56.C | -4.391232 | -2.522634 | 3.700102  | 107.H | -2.540830 | -4.848890 | -2.529158 |
| 57.C | -2.944669 | -2.005756 | 3.841629  | 108.H | 1.778913  | 2.062961  | -2.631892 |
| 58.C | 6.742356  | -0.494153 | 4.106061  | 109.H | 0.457914  | -2.599850 | -2.711817 |
| 59.C | -0.572008 | 1.795081  | 4.008438  | 110.H | -5.827933 | -2.715016 | -2.160922 |
| 60.C | -0.967706 | 0.354206  | 4.374355  | 111.H | -1.868961 | 4.495212  | -2.529146 |
| 61.C | -2.160974 | -2.889939 | 4.831926  | 112.H | -6.469153 | 1.456130  | -2.418171 |
| 62.C | 3.228304  | -0.901342 | 4.833855  | 113.H | -0.029546 | 6.471197  | -2.184395 |
| 63.C | -3.942715 | 0.523739  | 5.558489  | 114.H | 1.477060  | -8.705713 | -2.073321 |
| 64.C | -3.684270 | 1.992542  | 5.957122  | 115.H | -0.081015 | -7.869521 | -1.955414 |
| 65.C | -0.496122 | 0.069418  | 5.817764  | 116.H | -4.394602 | -3.746742 | -2.106829 |
| 66.C | -3.951748 | -0.368367 | 6.819072  | 117.H | 4.803573  | 1.975913  | -2.076068 |
| 67.H | 5.103883  | 0.782109  | -7.141577 | 118.H | -2.412374 | 6.697595  | -1.925547 |
| 68.H | 3.343050  | 0.574047  | -7.085778 | 119.H | -4.999908 | 2.790046  | -2.023759 |
| 69.H | 0.081039  | -1.219881 | -6.273351 | 120.H | 4.062344  | -4.844002 | -1.963962 |
| 70.H | 1.806293  | -1.077870 | -6.648261 | 121.H | -1.538980 | 2.923017  | -1.774630 |
| 71.H | 4.090501  | 2.022229  | -6.382507 | 122.H | -2.910317 | -1.789597 | -1.799521 |
| 72.H | 1.327857  | 1.647151  | -6.523435 | 123.H | -8.218299 | 0.139197  | -1.338018 |
| 73.H | -0.333410 | 1.157063  | -6.151958 | 124.H | 6.718323  | -2.280404 | -1.307063 |
| 74.H | -2.725405 | -0.307651 | -5.680839 | 125.H | -2.004412 | -5.892512 | -1.198478 |
| 75.H | 4.471936  | -0.869672 | -5.414268 | 126.H | 2.672956  | -6.684870 | -1.264508 |
| 76.H | -3.033504 | 2.052560  | -5.254302 | 127.H | -7.183787 | -1.295063 | -1.248960 |
| 77.H | 1.273419  | -2.044958 | -5.256608 | 128.H | 1.377845  | 6.126989  | -1.159651 |
| 78.H | 6.558043  | 0.364277  | -5.135806 | 129.H | 3.619944  | 3.019583  | -1.274409 |
| 79.H | -4.388064 | -0.763422 | -5.274052 | 130.H | -3.701710 | 7.462454  | -0.982156 |
| 80.H | 0.529744  | 2.244100  | -5.052367 | 131.H | -3.574293 | 5.692164  | -1.046713 |
| 81.H | 2.431918  | 3.224192  | -4.802365 | 132.H | 5.225210  | -0.256819 | -1.201201 |
| 82.H | -6.373289 | 0.311758  | -4.616686 | 133.H | -3.711859 | 3.462127  | -1.050521 |
| 83.H | -4.728510 | 1.933930  | -4.755731 | 134.H | 3.539108  | 1.275800  | -1.036793 |
| 84.H | 3.408333  | -2.316429 | -4.563582 | 135.H | -1.052406 | -3.586057 | -0.975029 |
| 85.H | 4.126223  | 3.191279  | -4.285513 | 136.H | 5.402764  | -4.787187 | -0.795369 |
| 86.H | 5.736226  | 1.718053  | -4.343523 | 137.H | -0.992978 | -1.104618 | -1.003557 |
| 87.H | 0.443250  | -0.030042 | -4.090563 | 138.H | 0.598669  | 3.761063  | -0.849866 |
| 88.H | -3.022226 | -1.563884 | -4.468250 | 139.H | -0.583630 | 8.076866  | -0.601926 |
| 89.H | -7.947530 | 0.068972  | -3.835602 | 140.H | 0.861090  | -8.197717 | -0.489064 |
| 90.H | -6.758759 | -1.245402 | -3.856294 | 141.H | -6.807360 | 0.119981  | -0.258417 |

|       |           |           |           |                                                                                                              |           |           |           |
|-------|-----------|-----------|-----------|--------------------------------------------------------------------------------------------------------------|-----------|-----------|-----------|
| 142.H | -6.008963 | 3.842556  | -0.039576 | 193.H                                                                                                        | 6.942720  | 0.571331  | 3.923788  |
| 143.H | -1.979791 | 8.859314  | 0.159404  | 194.H                                                                                                        | 5.385015  | -2.926258 | 4.034308  |
| 144.H | 5.967278  | -2.863274 | 0.197663  | 195.H                                                                                                        | 3.376745  | 1.963753  | 4.095109  |
| 145.H | -6.166868 | 2.076869  | 0.112850  | 196.H                                                                                                        | 5.139791  | 2.007498  | 4.310653  |
| 146.H | 6.257066  | -0.387968 | 0.211292  | 197.H                                                                                                        | -0.406694 | -0.325110 | 3.703403  |
| 147.H | -5.225669 | -1.846442 | 0.225693  | 198.H                                                                                                        | 7.708614  | -0.972352 | 4.345035  |
| 148.H | -3.854180 | -2.963945 | 0.175596  | 199.H                                                                                                        | 0.507733  | 1.952585  | 4.163963  |
| 149.H | 3.306665  | -5.409718 | 0.367512  | 200.H                                                                                                        | -2.258292 | -3.952406 | 4.551701  |
| 150.H | -0.481619 | -6.589793 | 0.552322  | 201.H                                                                                                        | -4.973414 | -2.379775 | 4.624242  |
| 151.H | 5.793219  | 1.780158  | 0.471703  | 202.H                                                                                                        | -1.099627 | 2.532984  | 4.629325  |
| 152.H | -3.579050 | -1.264637 | 0.561100  | 203.H                                                                                                        | -1.087091 | -2.656597 | 4.837810  |
| 153.H | -0.700786 | 8.153146  | 1.166100  | 204.H                                                                                                        | 6.116029  | -0.565331 | 5.008089  |
| 154.H | 3.777146  | -3.806448 | 0.891177  | 205.H                                                                                                        | 3.946617  | -1.688953 | 5.105882  |
| 155.H | -2.717639 | 6.700959  | 1.133897  | 206.H                                                                                                        | 3.643463  | 0.055398  | 5.176143  |
| 156.H | -4.318963 | 4.936833  | 0.901184  | 207.H                                                                                                        | -3.664854 | 2.669724  | 5.090731  |
| 157.H | 2.009653  | 4.231891  | 0.843568  | 208.H                                                                                                        | -4.970454 | 0.482082  | 5.150262  |
| 158.H | 0.945617  | 6.452865  | 1.193152  | 209.H                                                                                                        | 2.310574  | -1.091170 | 5.413006  |
| 159.H | 1.874615  | -7.152550 | 1.296141  | 210.H                                                                                                        | -2.531347 | -2.793502 | 5.864118  |
| 160.H | -1.523540 | -4.400515 | 1.103803  | 211.H                                                                                                        | 0.589930  | 0.232734  | 5.906288  |
| 161.H | 5.673972  | 3.227734  | 1.482605  | 212.H                                                                                                        | -0.703710 | -0.958282 | 6.142039  |
| 162.H | 1.148910  | 1.163682  | 1.398727  | 213.H                                                                                                        | -2.721364 | 2.104944  | 6.478299  |
| 163.H | -5.160933 | 0.255821  | 1.459394  | 214.H                                                                                                        | -4.465700 | 2.357157  | 6.645749  |
| 164.H | 3.616496  | 1.793004  | 1.638162  | 215.H                                                                                                        | -0.980748 | 0.746549  | 6.536924  |
| 165.H | 6.675632  | 1.866236  | 2.011262  | 216.H                                                                                                        | -4.248377 | -1.402924 | 6.596323  |
| 166.H | -0.080360 | -3.901969 | 1.999178  | 217.H                                                                                                        | -2.966690 | -0.403081 | 7.308613  |
| 167.H | 6.797207  | -1.049509 | 2.048606  | 218.H                                                                                                        | -4.667900 | 0.024907  | 7.561815  |
| 168.H | 1.911587  | -5.647915 | 2.242208  | 219.As                                                                                                       | 0.658081  | 1.039938  | -0.054137 |
| 169.H | 1.908817  | -2.345466 | 1.932328  | 220.As                                                                                                       | -0.543569 | -1.044748 | 0.471823  |
| 170.H | -6.447002 | 2.226618  | 2.358796  | 221.N                                                                                                        | 2.880842  | -1.098356 | -2.844052 |
| 171.H | 1.140552  | 3.562559  | 2.234653  | 222.N                                                                                                        | 4.666957  | -2.886830 | -1.460190 |
| 172.H | 5.518805  | -3.240224 | 2.297485  | 223.N                                                                                                        | -3.831792 | 1.321180  | -0.938059 |
| 173.H | -4.964729 | 4.675591  | 2.538456  | 224.N                                                                                                        | 2.121261  | -3.802542 | -0.474523 |
| 174.H | 2.369332  | 4.819932  | 2.478666  | 225.N                                                                                                        | 4.174159  | -0.891402 | 0.554411  |
| 175.H | 0.761328  | -6.927082 | 2.658463  | 226.N                                                                                                        | -1.940923 | 3.763392  | 1.171850  |
| 176.H | -1.073148 | -5.248149 | 2.596112  | 227.N                                                                                                        | -4.677787 | 2.909186  | 1.357384  |
| 177.H | -2.551887 | 5.220971  | 2.659943  | 228.N                                                                                                        | -3.385894 | 0.671091  | 2.581328  |
| 178.H | -0.747798 | 6.820980  | 3.044169  | 229.Si                                                                                                       | 2.831539  | 0.296374  | -3.969481 |
| 179.H | -2.460563 | -2.125155 | 2.853094  | 230.Si                                                                                                       | -4.397118 | 0.129580  | -2.145627 |
| 180.H | -4.932344 | -2.027152 | 2.883511  | 231.Si                                                                                                       | 0.885055  | -5.050735 | -0.763766 |
| 181.H | -2.773748 | 3.549644  | 3.135801  | 232.Si                                                                                                       | -0.957078 | 5.083817  | 0.485292  |
| 182.H | 6.981745  | -3.146937 | 3.301552  | 233.Si                                                                                                       | 4.434293  | -0.390305 | 2.246885  |
| 183.H | 3.010396  | -3.106804 | 3.093447  | 234.Si                                                                                                       | -2.822531 | -0.092122 | 4.091961  |
| 184.H | -5.399503 | 0.143615  | 3.194832  | 235.U                                                                                                        | 2.372576  | -1.545189 | -0.669200 |
| 185.H | -0.760643 | 2.071063  | 2.956998  | 236.U                                                                                                        | -2.345415 | 1.542558  | 0.756989  |
| 186.H | 4.311761  | 3.335569  | 3.479476  | Energy: -29169.12 kcal/mol                                                                                   |           |           |           |
| 187.H | 2.153310  | -0.145890 | 3.129076  |                                                                                                              |           |           |           |
| 188.H | -5.056602 | 2.601949  | 3.406026  |                                                                                                              |           |           |           |
| 189.H | -4.395454 | -3.604062 | 3.482305  |                                                                                                              |           |           |           |
| 190.H | 0.866081  | 6.423453  | 3.663835  |                                                                                                              |           |           |           |
| 191.H | -0.402345 | 5.187889  | 3.654199  |                                                                                                              |           |           |           |
| 192.H | 1.432575  | -2.492999 | 3.614493  |                                                                                                              |           |           |           |
|       |           |           |           | <b>Table S6. Final coordinates and single point energy of the Z isomer of 3 after geometry optimisation.</b> |           |           |           |
|       |           |           |           | 1.C                                                                                                          | 3.485252  | 3.857613  | -6.189382 |
|       |           |           |           | 2.C                                                                                                          | 2.129142  | 0.424956  | -6.373099 |

|      |           |           |           |       |           |           |           |
|------|-----------|-----------|-----------|-------|-----------|-----------|-----------|
| 3.C  | 1.358196  | 1.415805  | -5.476752 | 54.C  | -0.423968 | -3.872323 | 3.276995  |
| 4.C  | 3.851715  | 3.159901  | -4.860593 | 55.C  | 3.050419  | 0.409918  | 3.389775  |
| 5.C  | 0.027603  | 0.787526  | -5.028142 | 56.C  | -2.690733 | -4.787075 | 3.892116  |
| 6.C  | -2.894069 | -1.834409 | -4.954164 | 57.C  | 5.915438  | 2.952248  | 4.207818  |
| 7.C  | -4.565101 | -0.061421 | -4.287681 | 58.C  | 2.349986  | 3.791023  | 3.984733  |
| 8.C  | 4.540582  | 4.170037  | -3.921280 | 59.C  | -1.651491 | -3.685957 | 4.185386  |
| 9.C  | -5.894531 | -3.647086 | -3.748500 | 60.C  | -1.181114 | 0.802062  | 4.268403  |
| 10.C | 0.728716  | 4.487466  | -3.854452 | 61.C  | -0.897129 | -0.692618 | 4.490550  |
| 11.C | -3.473006 | -1.023391 | -3.777734 | 62.C  | 3.327013  | 0.520879  | 4.906550  |
| 12.C | 4.892061  | -4.135678 | -3.353166 | 63.C  | -3.680562 | -1.825126 | 5.618542  |
| 13.C | 4.208995  | 0.160538  | -3.600279 | 64.C  | -4.056767 | -0.398372 | 6.066511  |
| 14.C | 5.517844  | 0.585838  | -2.944861 | 65.C  | -0.268570 | -0.911841 | 5.882664  |
| 15.C | 1.561542  | -2.524493 | -3.168219 | 66.C  | -3.331985 | -2.679484 | 6.857640  |
| 16.C | 1.228905  | 3.293965  | -3.014263 | 67.H  | 1.525526  | 0.146293  | -7.253579 |
| 17.C | -2.573259 | -4.519154 | -2.659564 | 68.H  | 3.098039  | 3.154669  | -6.940769 |
| 18.C | 1.346104  | -4.981056 | -2.729845 | 69.H  | 4.373803  | 4.346711  | -6.625283 |
| 19.C | -5.654468 | -2.956802 | -2.388380 | 70.H  | 3.079123  | 0.836538  | -6.746406 |
| 20.C | 4.633110  | -6.114083 | -1.794493 | 71.H  | 2.724111  | 4.640522  | -6.047132 |
| 21.C | 4.682908  | -4.574164 | -1.887402 | 72.H  | 1.112509  | 2.295260  | -6.102430 |
| 22.C | -3.152721 | 2.620929  | -2.017663 | 73.H  | 2.356548  | -0.506800 | -5.833024 |
| 23.C | 1.632188  | -3.608929 | -2.079664 | 74.H  | -0.532178 | 0.398786  | -5.895830 |
| 24.C | -2.513982 | -3.232960 | -1.805233 | 75.H  | -2.580322 | -1.155930 | -5.765479 |
| 25.C | -2.603394 | 5.052764  | -1.739407 | 76.H  | 4.607523  | 2.394068  | -5.116554 |
| 26.C | 1.764554  | 3.787562  | -1.659826 | 77.H  | -3.629257 | -2.532576 | -5.383387 |
| 27.C | -5.935403 | -3.943062 | -1.234377 | 78.H  | -4.180498 | 0.552729  | -5.119735 |
| 28.C | 6.031384  | -1.097856 | -1.214177 | 79.H  | -5.444386 | -0.604557 | -4.668989 |
| 29.C | -2.522841 | 3.659889  | -1.074162 | 80.H  | 0.252558  | 4.168071  | -4.792856 |
| 30.C | -5.390915 | -0.066244 | -0.870163 | 81.H  | -5.818957 | -2.943812 | -4.590272 |
| 31.C | 6.011390  | 1.312183  | -0.629285 | 82.H  | 5.454694  | 4.579808  | -4.384177 |
| 32.C | -5.873816 | 4.258258  | -0.241836 | 83.H  | 4.279920  | 0.321007  | -4.687495 |
| 33.C | -2.353650 | -3.630401 | -0.328201 | 84.H  | -2.008804 | -2.416180 | -4.661715 |
| 34.C | 4.865723  | 2.212132  | -0.175375 | 85.H  | -0.624250 | 1.508947  | -4.514746 |
| 35.C | 5.150020  | -1.808116 | -0.194408 | 86.H  | 0.190767  | -0.053056 | -4.337792 |
| 36.C | -6.225608 | -0.410701 | 0.357180  | 87.H  | 1.549762  | 5.172632  | -4.115966 |
| 37.C | -4.739579 | 6.166320  | 0.962455  | 88.H  | 4.081381  | -4.498964 | -4.002650 |
| 38.C | -4.864046 | 4.629797  | 0.866088  | 89.H  | 5.834794  | -4.541850 | -3.757328 |
| 39.C | 1.927092  | -5.661409 | 0.699863  | 90.H  | -5.177833 | -4.462005 | -3.930424 |
| 40.C | 2.777462  | -4.375483 | 0.712314  | 91.H  | -6.904857 | -4.090962 | -3.781134 |
| 41.C | -1.129582 | 5.707045  | 1.405023  | 92.H  | 3.882006  | 5.024126  | -3.700274 |
| 42.C | 3.972265  | -4.543369 | 1.672769  | 93.H  | -2.641611 | -4.316293 | -3.736170 |
| 43.C | 3.430305  | 4.652367  | 1.864757  | 94.H  | 2.367269  | -2.630505 | -3.908021 |
| 44.C | -1.808591 | 4.406557  | 1.880081  | 95.H  | -4.910415 | 0.631224  | -3.509476 |
| 45.C | -5.679812 | 1.271899  | 2.094864  | 96.H  | 4.928404  | -3.041716 | -3.463515 |
| 46.C | -4.467918 | -2.163570 | 2.460951  | 97.H  | 6.399094  | 0.119308  | -3.423842 |
| 47.C | -4.340905 | 1.881375  | 2.500096  | 98.H  | 0.606657  | -2.587143 | -3.715874 |
| 48.C | -5.589869 | -1.144997 | 2.626125  | 99.H  | 4.088052  | -0.930069 | -3.476238 |
| 49.C | 2.817232  | 3.420403  | 2.562903  | 100.H | 2.094095  | -5.221333 | -3.499667 |
| 50.C | 5.729219  | 2.085165  | 2.943215  | 101.H | -0.013184 | 5.075830  | -3.291453 |
| 51.C | 6.522089  | 0.768352  | 3.093865  | 102.H | -2.648603 | -0.397484 | -3.384246 |
| 52.C | 3.362514  | -1.024505 | 2.930689  | 103.H | 4.829344  | 3.726361  | -2.956987 |
| 53.C | -2.242611 | 4.539955  | 3.354635  | 104.H | 5.619153  | 1.672894  | -3.043379 |

|       |           |           |           |       |           |           |          |
|-------|-----------|-----------|-----------|-------|-----------|-----------|----------|
| 105.H | 0.364496  | -4.970272 | -3.229485 | 156.H | 3.593760  | 4.480271  | 0.792818 |
| 106.H | -2.660380 | 2.645645  | -3.003304 | 157.H | 4.683555  | -5.303939 | 1.313353 |
| 107.H | 5.530002  | -6.557205 | -2.261965 | 158.H | 2.137952  | -3.573316 | 1.129056 |
| 108.H | 0.352159  | 2.656752  | -2.796728 | 159.H | -6.112457 | 1.878623  | 1.291366 |
| 109.H | -1.672559 | -5.130786 | -2.492550 | 160.H | 0.516665  | 0.376363  | 1.660006 |
| 110.H | 2.133472  | 5.023692  | -2.735808 | 161.H | -4.127172 | 6.482935  | 1.818691 |
| 111.H | 3.758199  | -6.531428 | -2.315623 | 162.H | -5.309215 | 4.301875  | 1.823594 |
| 112.H | -3.437587 | -5.141320 | -2.384783 | 163.H | -4.547496 | -2.619460 | 1.458119 |
| 113.H | 1.609088  | -1.491632 | -2.780986 | 164.H | 1.664856  | -5.953487 | 1.730848 |
| 114.H | -6.415934 | -2.157322 | -2.314826 | 165.H | 4.527347  | -3.607859 | 1.818892 |
| 115.H | -4.220486 | 2.821312  | -2.186890 | 166.H | -0.341581 | 6.007776  | 2.116444 |
| 116.H | 6.030335  | -1.681525 | -2.142773 | 167.H | -1.037279 | 3.612323  | 1.847102 |
| 117.H | 1.340769  | -5.806198 | -2.005881 | 168.H | 4.395217  | 4.942409  | 2.310229 |
| 118.H | -1.599153 | -2.683357 | -2.101624 | 169.H | 6.203547  | 2.647946  | 2.118311 |
| 119.H | -3.645917 | 5.370194  | -1.889577 | 170.H | 2.760253  | 5.524025  | 1.955299 |
| 120.H | -6.000002 | -0.242609 | -1.770732 | 171.H | 3.111755  | -1.206198 | 1.875089 |
| 121.H | 2.648961  | 4.429924  | -1.772707 | 172.H | 1.909760  | 3.149333  | 1.988709 |
| 122.H | 5.588341  | -4.264684 | -1.331691 | 173.H | 6.410213  | 0.100814  | 2.226948 |
| 123.H | -3.057556 | 1.587902  | -1.651439 | 174.H | -6.592117 | -1.610521 | 2.577004 |
| 124.H | -6.978119 | -4.302516 | -1.265165 | 175.H | -0.673472 | -3.692776 | 2.221152 |
| 125.H | -5.288099 | -4.831045 | -1.295676 | 176.H | 3.624783  | -4.872019 | 2.667076 |
| 126.H | -5.568144 | 4.664920  | -1.217681 | 177.H | -6.400686 | 1.257097  | 2.933414 |
| 127.H | 6.801931  | 1.878869  | -1.155315 | 178.H | -3.035157 | -4.741574 | 2.847497 |
| 128.H | 4.599010  | -6.466769 | -0.753670 | 179.H | -4.517823 | 2.849856  | 2.992687 |
| 129.H | 0.814099  | -3.409557 | -1.359988 | 180.H | 7.599463  | 0.970305  | 3.220305 |
| 130.H | -2.099878 | 5.836683  | -1.159169 | 181.H | -4.624681 | -2.993175 | 3.168103 |
| 131.H | 0.999519  | 4.377819  | -1.130114 | 182.H | 4.424009  | -1.273594 | 3.072616 |
| 132.H | 7.078472  | -1.012940 | -0.869105 | 183.H | -0.034535 | -4.901424 | 3.354471 |
| 133.H | 4.388659  | 2.642617  | -1.074270 | 184.H | -3.075657 | 5.250190  | 3.477352 |
| 134.H | 2.044065  | 2.966078  | -0.979769 | 185.H | -3.892452 | 1.240525  | 3.280495 |
| 135.H | -5.184868 | 1.018139  | -0.863343 | 186.H | 1.965212  | 0.567706  | 3.244420 |
| 136.H | -1.450387 | 3.404796  | -0.981584 | 187.H | -5.487775 | -0.672089 | 3.609883 |
| 137.H | -5.988052 | 3.171798  | -0.369415 | 188.H | -1.538101 | 1.028298  | 3.250147 |
| 138.H | -6.871877 | 4.672841  | -0.019422 | 189.H | 0.397954  | -3.190490 | 3.538043 |
| 139.H | -5.770072 | -3.491214 | -0.245103 | 190.H | 2.779401  | -1.753345 | 3.516591 |
| 140.H | -1.495924 | -4.311472 | -0.201065 | 191.H | -2.555875 | 3.578204  | 3.781170 |
| 141.H | -4.295060 | 6.603761  | 0.055782  | 192.H | -1.409028 | 4.913458  | 3.973069 |
| 142.H | 5.611687  | -2.776210 | 0.055452  | 193.H | 5.472187  | 3.952019  | 4.097946 |
| 143.H | -3.241326 | -4.151552 | 0.056768  | 194.H | 6.196204  | 0.201273  | 3.978736 |
| 144.H | 6.463588  | 0.847372  | 0.254263  | 195.H | -2.250209 | -5.787666 | 4.041118 |
| 145.H | 2.461064  | -6.512233 | 0.249171  | 196.H | 1.716646  | 4.693994  | 3.954671 |
| 146.H | -7.192993 | 0.125262  | 0.364106  | 197.H | -0.141157 | -0.988411 | 3.739997 |
| 147.H | -0.250056 | 1.685594  | -0.507111 | 198.H | 6.989734  | 3.091865  | 4.420974 |
| 148.H | -6.438423 | -1.486832 | 0.343659  | 199.H | 1.751613  | 2.992564  | 4.446285 |
| 149.H | 0.982713  | -5.529624 | 0.153519  | 200.H | -3.577691 | -4.721879 | 4.540549 |
| 150.H | 5.277298  | 3.075404  | 0.370066  | 201.H | -0.265600 | 1.398571  | 4.412140 |
| 151.H | -2.155520 | -2.781216 | 0.348977  | 202.H | 3.192101  | 4.010856  | 4.659003 |
| 152.H | -0.649737 | 5.589855  | 0.422739  | 203.H | 5.468502  | 2.486594  | 5.099115 |
| 153.H | -5.736787 | 6.623661  | 1.086145  | 204.H | -1.933668 | 1.189951  | 4.969227 |
| 154.H | 5.158851  | -1.227953 | 0.744989  | 205.H | 4.390007  | 0.357147  | 5.138017 |
| 155.H | -1.836900 | 6.547788  | 1.334068  | 206.H | -1.312444 | -3.829293 | 5.229426 |



|        |           |           |           |                            |           |           |           |
|--------|-----------|-----------|-----------|----------------------------|-----------|-----------|-----------|
| 207.H  | -4.592825 | -2.275344 | 5.184484  | 223.N                      | -4.126549 | -0.846958 | -0.865303 |
| 208.H  | 3.044181  | 1.495493  | 5.325193  | 224.N                      | 3.767112  | -1.945658 | -0.720543 |
| 209.H  | -4.313111 | 0.259365  | 5.222954  | 225.N                      | 3.881092  | 1.432685  | 0.622316  |
| 210.H  | 2.760431  | -0.251397 | 5.451679  | 226.N                      | -3.441567 | 1.982571  | 1.319186  |
| 211.H  | 0.033370  | -1.956619 | 6.046137  | 227.N                      | -5.442781 | -0.101186 | 1.579988  |
| 212.H  | 0.628974  | -0.285441 | 6.006517  | 228.N                      | -3.153815 | -1.491089 | 2.632415  |
| 213.H  | -3.175844 | -3.738513 | 6.607843  | 229.Si                     | 2.400189  | 2.156288  | -4.028728 |
| 214.H  | -4.923504 | -0.414490 | 6.749278  | 230.Si                     | -3.961843 | -2.021904 | -2.195045 |
| 215.H  | -3.228373 | 0.080780  | 6.610680  | 231.Si                     | 3.234700  | -3.621453 | -1.009195 |
| 216.H  | -0.964887 | -0.637729 | 6.689985  | 232.Si                     | -3.182791 | 3.653644  | 0.738826  |
| 217.H  | -2.420575 | -2.321599 | 7.361338  | 233.Si                     | 3.887836  | 1.816602  | 2.368375  |
| 218.H  | -4.149107 | -2.634508 | 7.598674  | 234.Si                     | -2.367261 | -1.891516 | 4.177578  |
| 219.As | -0.371329 | 0.312000  | -1.192340 | 235.U                      | 2.778069  | 0.085060  | -0.849926 |
| 220.As | 0.296852  | -0.917245 | 0.853968  | 236.U                      | -2.785701 | -0.143084 | 0.816002  |
| 221.N  | 3.076044  | 0.891731  | -2.974848 | Energy: -29145.08 kcal/mol |           |           |           |
| 222.N  | 5.460818  | 0.243265  | -1.500962 |                            |           |           |           |

## References

1. B. M. Gardner, G. Balázs, M. Scheer, F. Tuna, E. J. L. McInnes, J. McMaster, W. Lewis, A. J. Blake, S. T. Liddle, *Angew. Chem. Int. Ed.* **2014**, *53*, 4484.
2. B. M. Gardner, G. Balázs, M. Scheer, F. Tuna, E. J. L. McInnes, J. McMaster, W. Lewis, A. J. Blake, S. T. Liddle, *Nat. Chem.* **2015**, *7*, 582.
3. W. C. Johnson, A. Pechukas, *J. Am. Chem. Soc.* **1937**, *59*, 2068.
4. C. Fonseca Guerra, J. G. Snijders, G. te Velde E. J. Baerends, *Theor. Chem. Acc.* **1998**, *99*, 391.
5. G. te Velde, F. M. Bickelhaupt, S. J. A. van Gisbergen, C. Fonseca Guerra, E. J. Baerends, J. G. Snijders T. Ziegler, *J. Comput. Chem.* **2001**, *22*, 931.
6. S. H. Vosko, L. Wilk, M. Nusair, *Can. J. Phys.* **1980**, *58*, 1200.
7. A. D. Becke, *Phys. Rev. A.* **1988**, *38*, 3098.
8. J. P. Perdew, *Phys. Rev. B.* **1986**, *33*, 8822.
9. S. Portmann, H. P. Luthi, *Chimia* **2000**, *54*, 766.
10. NBO 5.0: E. D. Glendening, J. K. Badenhoop, A. E. Reed, J. E. Carpenter, J. A. Bohmann, C. M. Morales, F. Weinhold, (Theoretical Chemistry Institute, University of Wisconsin, Madison, WI, 2001); <http://www.chem.wisc.edu/~nbo5>.
